# Supplementary material for: Profile of STING agonist and inhibitor research: a bibliometric analysis
Source: Front Pharmacol. 2025 Feb 11;16:1528459. doi: 10.3389/fphar.2025.1528459 (PMC11850258; doi:10.3389/fphar.2025.1528459)
Supplement: Supplementary file 1 [file Table1.xlsx]

## Sheet: sting agonists
Drug Name	Pioneering R&D Company	Therapeutic Area	Indication	Global Highest Stage of Development	Target Molecule
Trex-1 inhibitor (oral, solid tumor)	Inception Therapeutics Inc	cancer	Solid Tumor	Preclinical	cGAS	STING	TREX1
LCB-39	LigaChem Bioscience Inc	cancer	Solid Tumor	Preclinical		STING
dazostinag sodium	Millennium Pharmaceuticals Ltd	cancer	Advanced Solid Tumor; Colorectal Tumor; Head and Neck Tumor; Mesothelioma	Phase II Clinical Trial		STING
ulevostinag	Merck	cancer	Advanced Solid Tumor; Lymphoma; Metastatic Head and Neck Cancer; Squamous Cell Carcinoma	Phase II Clinical Trial		STING
hafnium oxide	Nanobiotix Sa	cancer	Adenocarcinoma; Esophageal Tumor; Gastroesophageal Junction Cancer; Hepatocellular Carcinoma; Laryngeal Tumor; Liver Tumor; Lung Tumor; Metastatic Breast Cancer; Metastatic Head and Neck Cancer; Metastatic Liver Cancer; Metastatic Non-Small Cell Lung Cancer; Oral Tumor; Pancreatic Ductal Adenocarcinoma; Laryngeal Tumor; Prostate Tumor; Rectal Cancer; Renal Cell Carcinoma; Soft Tissue Sarcoma; Squ…	Approved for Market		STING
BI-1703880	Boehringer Ingelheim	cancer	Advanced Solid Tumor	Phase I Clinical Trial		STING
CRD-3874	Curadev Pharma Pvt Ltd	cancer	Advanced Solid Tumor; Hemangiopericytoma; Merkel Cell Carcinoma; Myxofibrosarcoma; Osteosarcoma; Sarcoma; Undifferentiated Pleomorphic Sarcoma	Phase I Clinical Trial		STING
DN-028073	Shanghai Dyno Pharmaceuticals Co., Ltd	cancer	Malignant Tumor	Preclinical	HER2	STING
SR-8541A	Translational Genomics Research Institute	cancer	Advanced Solid Tumor; Breast Tumor; Malignant Tumor; Colon Tumor	Phase I Clinical Trial	ENPP1	STING
IMSA-101	ImmuneSensor Therapeutics Inc	cancer	Advanced Solid Tumor; Head and Neck Tumor; Hematological Tumor; Hepatocellular Carcinoma; Melanoma; Metastatic Breast Cancer; Metastatic Esophageal Cancer; Metastatic Non-Small Cell Lung Cancer; Metastatic Gastric Cancer; Renal Cell Carcinoma; Uveal Melanoma	Phase II Clinical Trial		STING
intranasal subunit vaccine	AuraVax Therapeutics Inc	cancer	Coronavirus Infection	Preclinical		STING
STING agonist ADC (cancer)	Ryvu Therapeutics	cancer	Malignant Tumor	Drug Discovery		STING
CMR-215	Calibr-Skaggs Institute for Innovative Medicines	cancer	Bladder Cancer	Preclinical		STING
XMT-2056	Mersana Therapeutics Inc	cancer	Advanced Solid Tumor; Metastatic Breast Cancer; Metastatic Colorectal Cancer; Metastatic Non-Small Cell Lung Cancer; Metastatic Gastric Cancer	Phase I Clinical Trial	HER2	STING
ONM-501	University of Texas Southwestern Medical Center	cancer	Advanced Solid Tumor; Bladder Cancer; Diffuse Large B-Cell Lymphoma; Follicular Lymphoma; Lymphoma; Mantle Cell Lymphoma; Metastatic Breast Cancer; Metastatic Head and Neck Cancer; Non-Hodgkin Lymphoma; Skin Cancer; Squamous Cell Carcinoma; Triple-Negative Breast Cancer; Cervical Tumor; Uveal Melanoma	Phase I Clinical Trial		STING
ONO-7914	Otsuka Pharmaceutical Co., Ltd	cancer	Advanced Solid Tumor	Phase I Clinical Trial		STING
ZSA-51	University of Michigan	cancer	Malignant Tumor; Colon Tumor; Pancreatic Tumor	Preclinical		STING
SH-273	University of Michigan	cancer	Pancreatic Ductal Adenocarcinoma	Preclinical	PI3Kγ	STING
ACTM-838	University of Ottawa	cancer	Advanced Solid Tumor	Phase I Clinical Trial	IL-15R	STING
exoSTING	Codiak BioSciences Inc	neurological diseases; cancer	Advanced Solid Tumor; Anaplastic Thyroid Cancer; Bladder Cancer; Malignant Tumor; Metastatic Breast Cancer; Metastatic Head and Neck Cancer; Leptomeningeal Tumor; Skin Cancer; Solid Tumor; Squamous Cell Carcinoma; Triple-Negative Breast Cancer	Phase II Clinical Trial		STING
ZXP-8177	Nanjing Zhengxiang Pharmaceuticals Co., Ltd	cancer	Advanced Solid Tumor; Malignant Tumor	Clinical Trial Application (CTA)	ENPP1	STING
STING agonist LNP delivered (inhaled, Lung adenocarcinoma)	InhaTarget Therapeutics	cancer	Lung Tumor; Non-Small Cell Lung Cancer	Preclinical		STING
PF-07820435	Pfizer Inc	cancer	Advanced Solid Tumor; Metastatic Colorectal Cancer; Metastatic Head and Neck Cancer; Metastatic Non-Small Cell Lung Cancer; Metastatic Ovarian Cancer; Metastatic Renal Cell Carcinoma; Squamous Cell Carcinoma; Stage IV Melanoma; Transitional Cell Carcinoma	Phase I Clinical Trial		STING
KL-340399	Sichuan Kelun-Botai Biopharmaceutical Co., Ltd	cancer	Advanced Solid Tumor	Phase I Clinical Trial	cGAS	STING
STI-001	Institut Curie	infectious diseases; cancer	Malignant Tumor; Infectious Disease	Preclinical		STING
TAK-500	Takeda Pharmaceutical Company Limited	cancer	Advanced Solid Tumor; Hepatocellular Carcinoma; Mesothelioma; Metastatic Breast Cancer; Metastatic Esophageal Cancer; Metastatic Non-Small Cell Lung Cancer; Metastatic Pancreatic Cancer; Metastatic Renal Cell Carcinoma; Metastatic Gastric Cancer; Pancreatic Ductal Adenocarcinoma; Solid Tumor; Squamous Cell Carcinoma	Phase II Clinical Trial		STING
HG-381	Chengdu Lead Pharma Co., Ltd	cancer	Advanced Solid Tumor	Phase I Clinical Trial		STING
anti-PD-L1 antibody-immune modulator conjugate (cancer)	LigaChem Bioscience Inc	cancer	Malignant Tumor	Preclinical	PD-L1	STING
AVA-NP-695	Avammune Therapeutics Inc	cancer	Malignant Tumor	Preclinical	ENPP1	STING
IACS-8803	University of Texas MD Anderson Cancer Center	cancer	Malignant Tumor; Glioblastoma; Melanoma; Pancreatic Tumor	Preclinical		STING
BI-1387446	Boehringer Ingelheim	cancer	Advanced Solid Tumor; Metastatic Breast Cancer; Metastatic Colorectal Cancer; Metastatic Head and Neck Cancer; Metastatic Non-Small Cell Lung Cancer; Parathyroid Tumor; Soft Tissue Sarcoma; Stage IV Melanoma; Thyroid Tumor	Phase I Clinical Trial		STING
STING agonist drug conjugates (solid tumor)	ImmuneSensor Therapeutics Inc	cancer	Solid Tumor	Drug Discovery		STING
JAB-X1800	Beijing JiaKeSi Pharmaceutical Research and Development Co., Ltd	cancer	Solid Tumor	Preclinical	CD73	STING
STING agonist (cancer)	Seagen Inc	cancer	Malignant Tumor	Preclinical		STING
MTL-STING	MiNA Therapeutics Limited	cancer	Advanced Solid Tumor	Preclinical		STING
IMD-2739	Shanghai Qinheli Biopharmaceutical Technology Co., Ltd	cancer	Solid Tumor	Preclinical		STING
QHL-816	Shanghai Qinheli Biopharmaceutical Technology Co., Ltd	cancer	Solid Tumor	Preclinical		STING
ADU-S100	Chinook Therapeutics US Inc	cancer	Bladder Tumor; Metastatic Head and Neck Cancer; Squamous Cell Carcinoma	Phase II Clinical Trial		STING
LCB-33	LigaChem Bioscience Inc	cancer	Malignant Tumor; Colon Tumor	Preclinical	ENPP1	STING
ST-317	Aarhus University	cancer	Malignant Tumor	Preclinical		STING
PF-07101466	Pfizer Inc	cancer	Malignant Tumor	Drug Discovery		STING
E-7766	Eisai Co., Ltd	cancer	Advanced Solid Tumor; Bladder Cancer; Breast Tumor; Malignant Tumor; Colorectal Tumor; Head and Neck Tumor; Lymphoma; Melanoma; Squamous Cell Carcinoma; Transitional Cell Carcinoma	Phase I Clinical Trial		STING
STING agonist ADC	Spring Bank Pharmaceuticals Inc	cancer	Malignant Tumor	Preclinical		STING
small molecule-nucleic acid	Spring Bank Pharmaceuticals Inc	infectious diseases; cancer	Advanced Solid Tumor; Malignant Tumor; Hepatocellular Carcinoma; Metastatic Head and Neck Cancer; Squamous Cell Carcinoma; Stage IV Melanoma; Viral Infection	Phase I Clinical Trial		STING
DN-015089	Shanghai Dyno Pharmaceuticals Co., Ltd	cancer	Advanced Solid Tumor; Malignant Tumor	Phase I Clinical Trial		STING
STING agonist (cancer)	VENENUM Biodesign LLC	cancer	Malignant Tumor	Clinical		STING
CRD-5500 antibody-drug conjugate	Curadev Pharma Pvt Ltd	cancer	Malignant Tumor	Preclinical	HER2	STING
SNX-281	Silicon therapeutics	cancer	Advanced Solid Tumor; Lymphoma; Metastatic Colorectal Cancer; Metastatic Ovarian Cancer	Phase I Clinical Trial		STING
SYN-STING	Synlogic Inc	cancer	Advanced Solid Tumor; Lymphoma	Phase I Clinical Trial		STING
TRB-805-01	Trican Biotechnology Co Ltd	cancer	Malignant Tumor	Preclinical	CD47	STING	SIRPA
STING agonist (cancer)	Shanghai Institute of Materia Medica, Chinese Academy of Sciences	cancer	Malignant Tumor	Preclinical		STING
STING agonist (cancer/infectious disease)	Mavupharma Inc	infectious diseases; cancer	Malignant Tumor; Infectious Disease	Preclinical	ENPP1	STING
ALG-031048	Aligos Therapeutics Inc	cancer	Malignant Tumor; Hepatocellular Carcinoma	Preclinical		STING
anti-PD-L1 Affimer/STING agonist conjugate	Avacta Ltd	cancer	Malignant Tumor	Drug Discovery	PD-L1	STING
STING agonist (cancer)	Hangzhou Anuo Biopharmaceutical Technology Co., Ltd	cancer	Malignant Tumor	Preclinical		STING
SR-717	The Scripps Research Institute	cancer	Malignant Tumor; Melanoma	Preclinical		STING
STI-002	Stimunity SAS	infectious diseases; cancer	Infectious Disease; Solid Tumor	Preclinical		STING
rBCG-disA-OE	Johns Hopkins University	cancer	Bladder Cancer	Preclinical		STING
SOMCL-18-202	Shanghai Institute of Materia Medica, Chinese Academy of Sciences	cancer	Malignant Tumor	Preclinical		STING
AdVCA0848	Venn Therapeutics LLC	cancer	Malignant Tumor	Preclinical		STING
ONM-500	OncoNano Medicine Inc	infectious diseases; cancer	Malignant Tumor; Human Papillomavirus Infection	Drug Discovery		STING
non-cyclic dinucleotide STING agonist	Jiangsu Hengrui Medicine Co., Ltd	cancer	Malignant Tumor	Drug Discovery		STING
SiTX-799	Silicon therapeutics	cancer	Malignant Tumor	Preclinical		STING
O-04	A2A Pharmaceuticals Inc	cancer	Myeloid Leukemia	Drug Discovery		STING
STACT-TREX1	Actym Therapeutics Inc	cancer	Malignant Tumor	Preclinical	TREX1	STING
DN-015	Shanghai Dyno Pharmaceuticals Co., Ltd	cancer	Malignant Tumor	Preclinical		STING
SR-8314	Stingray Therapeutics LLC	cancer	Pancreatic Ductal Adenocarcinoma	Preclinical	ENPP1	STING
MAVU-104	Mavupharma Inc	cancer	Malignant Tumor	Drug Discovery	ENPP1	STING
STING agonist (cancer)	Merck	cancer	Malignant Tumor	Drug Discovery		STING
STING agonist (cancer)	Iterion Therapeutics Inc	cancer	Malignant Tumor	Drug Discovery		STING
SR-8291	Stingray Therapeutics LLC	cancer	Metastatic Breast Cancer	Drug Discovery	ENPP1	STING

## Sheet: sting inhibitors
Drug Name	Pioneering R&D Company	Therapeutic Area	Indication	Global Highest Stage of Development	Target Molecule
SB-11736	Spring Bank Pharmaceuticals Inc	Immunomodulation; Inflammation	Autoimmune Diseases; Autoinflammatory Diseases	Preclinical	STING
ISD-017	iSD Immunotech ApS	Immunomodulation	Systemic Lupus Erythematosus	Preclinical	STING
STING antagonist	Nimbus Therapeutics LLC	Immunomodulation	Autoimmune Diseases	Drug Discovery	STING
